# Supplementary material for: A metal surface with chiral memory
Source: Royal Society of Chemistry journal article supplement (doi:10.1039/c3cc48797k), 2013-12-24
Supplement: c3cc48797k.pdf [file c3cc48797k.pdf]

Supplementary Information

## A metal surface with chiral memory

Chrysanthi Karageorgaki<sup>a</sup> and Karl-Heinz Ernst<sup>\*a,b</sup>

<sup>a</sup>Empa, Swiss Federal Laboratories for Materials Science and Technology, Überlandstrasse 129, CH-8600 Dübendorf, Switzerland.

Tel.: +41 58 765 43 63

E-mail: karl-heinz.ernst@empa.ch

<sup>b</sup> Department of Chemistry, University of Zurich, CH-8057 Zürich, Switzerland

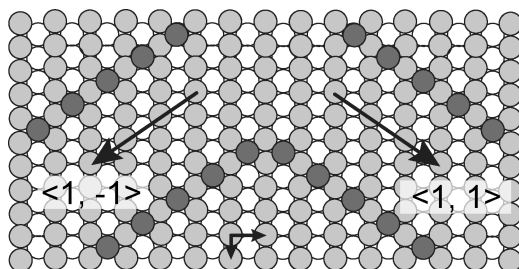

**Supplementary Information Fig. 1.** Definition of surface directions used here. The surface unit cell vectors are shown in the middle lower part of the figure.

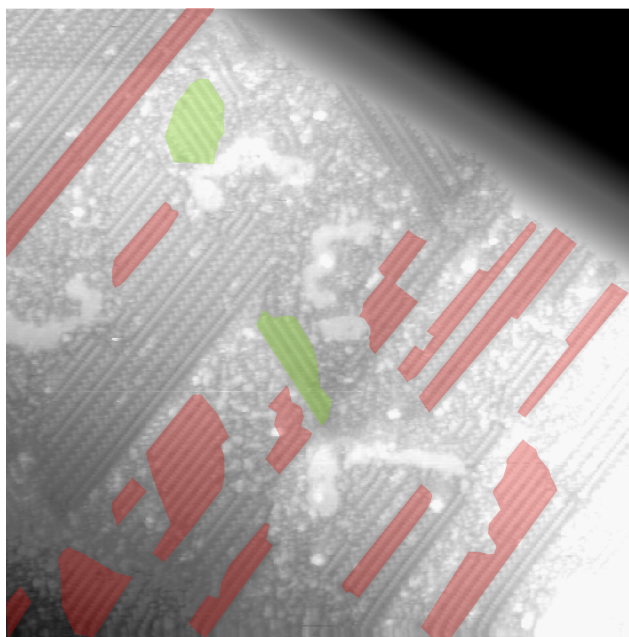

**Supplementary Information Fig. 2.** Long range STM image of maleic acid on Cu(110) after annealing 30 min at 150 °C (50 nm × 50 nm, U = 464 mV, I = 780 pA). The chiral areas without molecules are colored in green and red. At the black area mark a lower terrace where feedback control of the STM was lost.
